# Supplementary material for: Application of immersive interaction and 3D visualization technologies in the anatomy curriculum: A network meta-analysis
Source: Research Square preprint supplement (doi:10.21203/rs.3.rs-5630278/v1), 2025-04-10
Supplement: Supplementary file 1 [file 154ee535f56bebb1962857a9.docx]

# **Search Strings for search databases**

1. **The Cochrane Library**

([mh "Virtual Reality"] OR "Virtual Reality":ti,ab OR "Virtual Realities":ti,ab OR "Augmented reality":ti,ab OR "Mixed Reality":ti,ab OR AR:ti,ab OR VR:ti,ab OR MR:ti,ab) AND (Anatomy:ti,ab OR Anatomical:ti,ab OR Neuroanatomy:ti,ab OR Medical:ti,ab OR Biomedical:ti,ab OR Neurology:ti,ab OR "Basic Science":ti,ab OR "Basic Sciences":ti,ab OR Physiology:ti,ab OR Physiological:ti,ab) AND (Education:ti,ab OR Educational:ti,ab OR Curriculum:ti,ab OR Training:ti,ab OR Learning:ti,ab) AND ([mh "Students, Medical"] OR Students:ti,ab OR Student:ti,ab)

1. **PubMed**

(("Anatomy"[MeSH Terms] OR ("anatomy"[Title/Abstract] OR "Anatomical"[Title/Abstract] OR "Medical"[Title/Abstract] OR "Biomedical"[Title/Abstract] OR "Neurology"[Title/Abstract] OR "basic science"[Title/Abstract] OR "Physiology"[Title/Abstract])) AND "randomized controlled trial"[Publication Type] AND (("Virtual reality"[MeSH Terms] OR ("Virtual reality"[Title/Abstract] OR "augmented reality"[Title/Abstract] OR "mixed reality"[Title/Abstract] OR "three-dimensional"[Title/Abstract] OR "technology enhanced education"[Title/Abstract])) AND "randomized controlled trial"[Publication Type]) AND (("Education"[MeSH Terms] OR "Curriculum"[MeSH Terms] OR ("education*"[Title/Abstract] OR "Educational"[Title/Abstract] OR "Curriculum"[Title/Abstract] OR "Training"[Title/Abstract] OR "Learning"[All Fields] OR "course*"[Title/Abstract])) AND "randomized controlled trial"[Publication Type])) AND (randomized controlled trial[Filter])

1. **Embase**

('Virtual Reality'/exp OR "Virtual Reality":ti,ab OR "Virtual Realities":ti,ab OR "Augmented reality":ti,ab OR "three-dimensional":ti,ab OR "Mixed Reality":ti,ab OR AR:ti,ab OR VR:ti,ab OR MR:ti,ab) AND (Anatomy:ti,ab OR Anatomical:ti,ab OR Neuroanatomy:ti,ab OR Medical:ti,ab OR Biomedical:ti,ab OR Neurology:ti,ab OR "Basic Science":ti,ab OR "Basic Sciences":ti,ab OR Physiology:ti,ab OR Physiological:ti,ab) AND ('vocational education'/exp OR Education:ti,ab OR Educational:ti,ab OR Curriculum:ti,ab OR Training:ti,ab OR Learning:ti,ab)

**4. Web of science**

#1 TS = ( "Anatomy*" OR "Anatomical" OR "Medical" OR "Biomedical" OR "Neurology" OR "basic science" OR "Physiology" )

#2 TS = ("Virtual reality" OR "augmented reality" OR "mixed reality" OR "three-dimensional" OR "technology enhanced education" OR "VR" OR "AR" OR "MR" OR "3D" )

#3 TS = ( "Education*" OR "Educational" OR "Curriculum" OR "Training" OR "Learning"OR "Course*" )

#4 #1 AND #2 AND #3
